# Supplementary material
Source: PubMed Central journal article supplement (PMC7099133)
Supplement: JB.00593-19-s0001.pdf [file JB.00593-19-s0001.pdf]

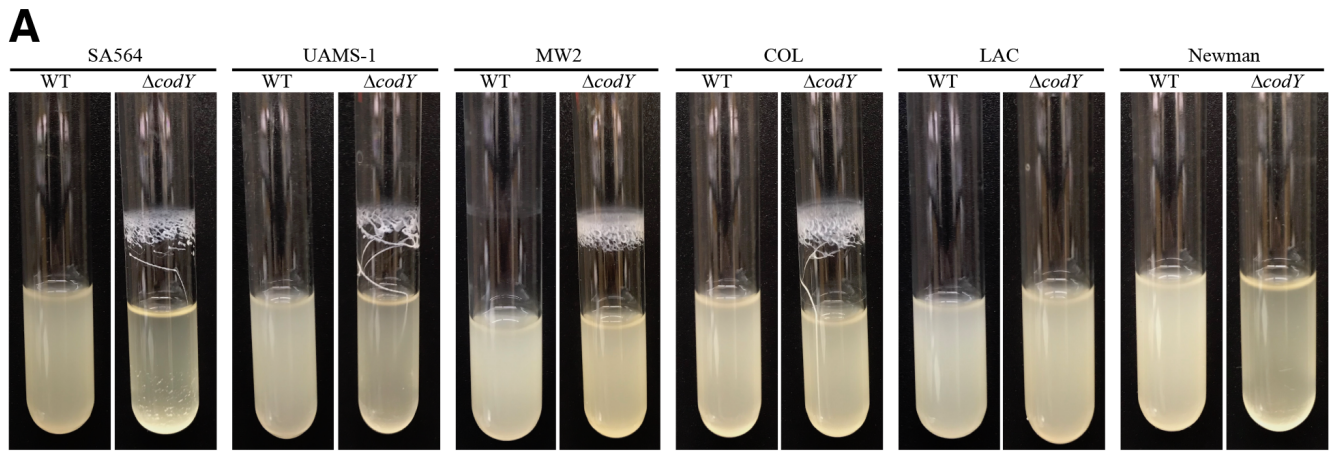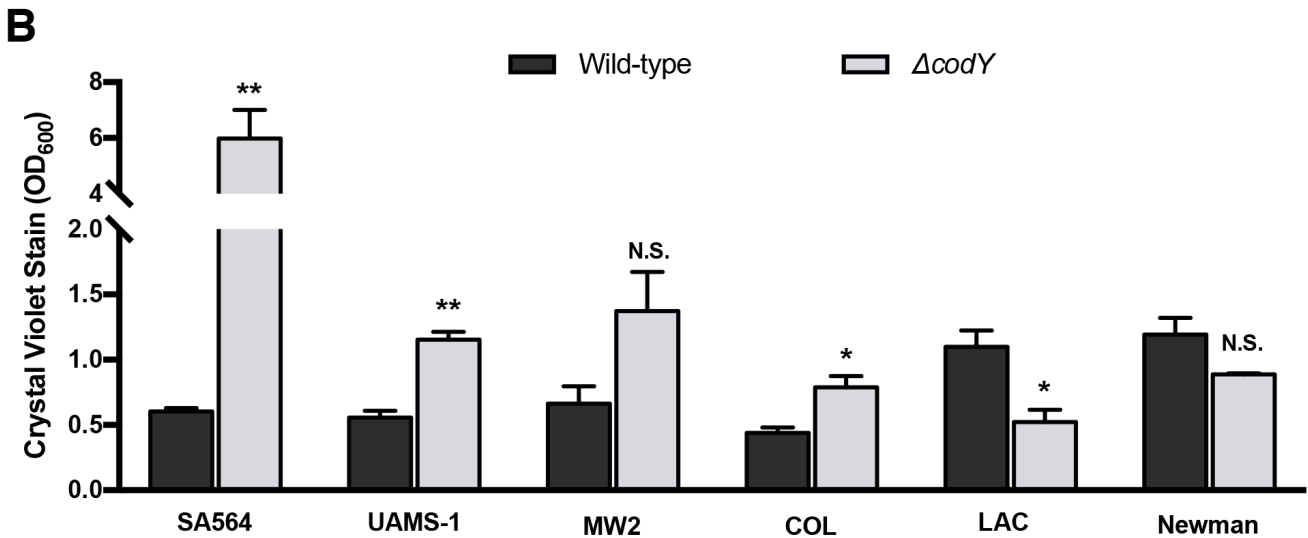

**Supplementary Figure 1. Cell aggregation and static biofilm formation are correlated. (A)** Representative images from overnight cultures of wild-type and an isogenic  $\Delta codY$  grown in TSB. The experiment was performed multiple times. **(B)** Results from static biofilm assays are shown. Statistics: \* $p < 0.05$ , \*\* $p < 0.01$  compared to the Wild-type parent strain (black bars) using Student's t-test. N.S., not significant.

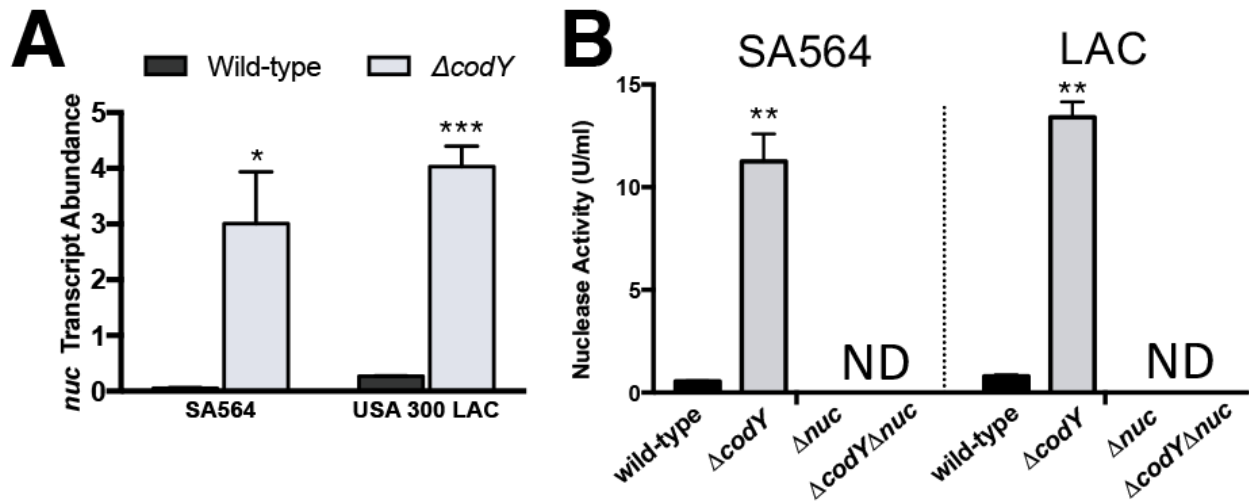

**Supplementary Figure 2. Secreted nuclease does not account for the opposing phenotypes observed in  $\Delta codY$  mutants from different isolates. (A)** SA564 and LAC cells were grown to exponential phase aerobically in TSB, and *nuc* transcript abundance in wild-type (black) and  $\Delta codY$  mutant (grey) cells was determined by qRT-PCR. Data were normalized to *rpoC* transcript (i.e., copies of *rpoC*). **(B)** Secreted nuclease activity was determined from cultures supernatants during exponential growth in TSB using a FRET assay (see *Materials and Methods*). Nuclease activity was undetectable in  $\Delta nuc$  and  $\Delta codY \Delta nuc$  mutants. Data indicate the mean  $\pm$  SEM of at least three independent experiments. \* $p < 0.05$ , \*\* $p < 0.01$ , \*\*\* $p < 0.001$ ; Students t-test comparing the  $\Delta codY$  mutant relative to its wild-type. ND, not detected. No statistical difference is observed when  $\Delta codY$  mutants are compared to one another.

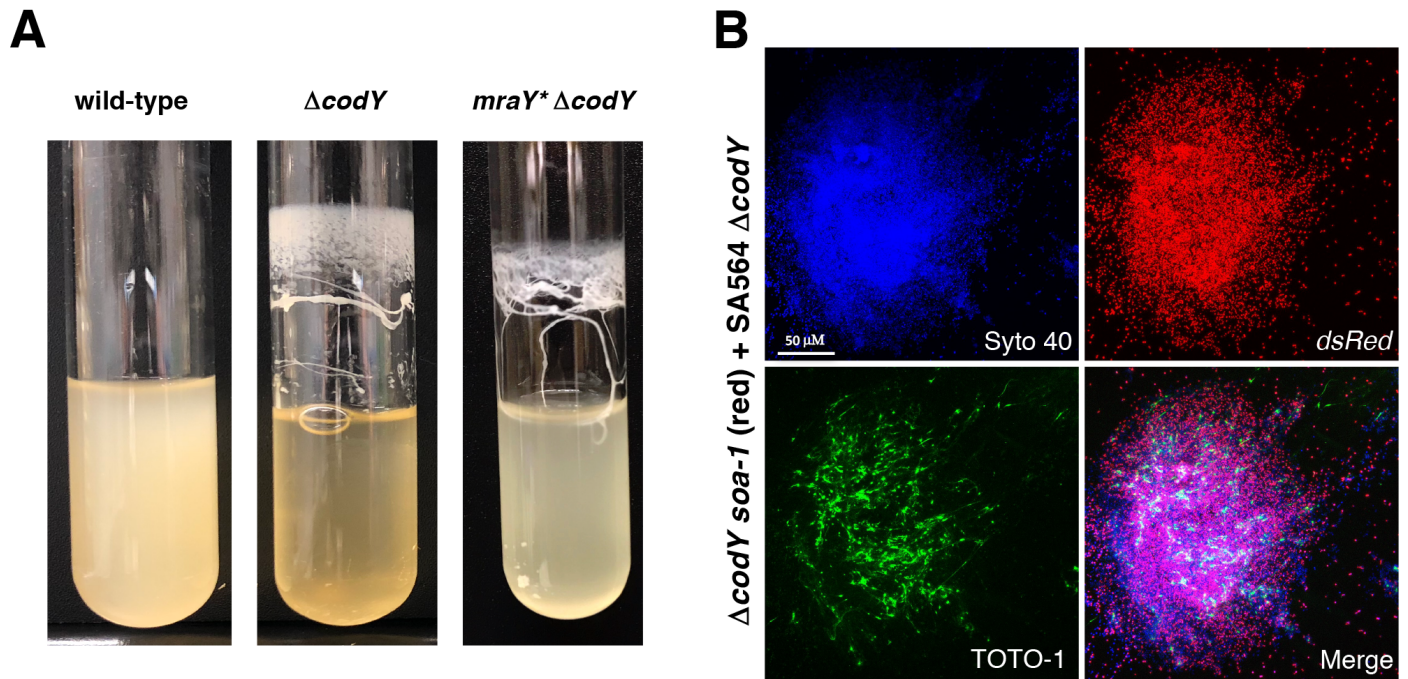

**Supplementary Figure 3. A SNP in *mraY* does not account for the loss of aggregation in  $\Delta codY$  *soa-1*, but co-culturing with a  $\Delta codY$  restores eDNA-dependent cell aggregation. (A)** Representative images of overnight cultures in TSB of SA564 (wild-type) as well as the isogenic  $\Delta codY$  mutant and reconstructed *mraY*\*  $\Delta codY$  mutant. **(B)** Results of a co-culture experiment performed using the suppressor mutant harboring pKM16 (red) and the SA564  $\Delta codY$  mutant during exponential growth in TSB. All cells are labeled with Syto40 (blue), eDNA and dead cells are labeled with TOTO-1 (green). Images are representative of multiple experiments. Scale bar is 50  $\mu$ m; all panels are viewed at the same magnification.

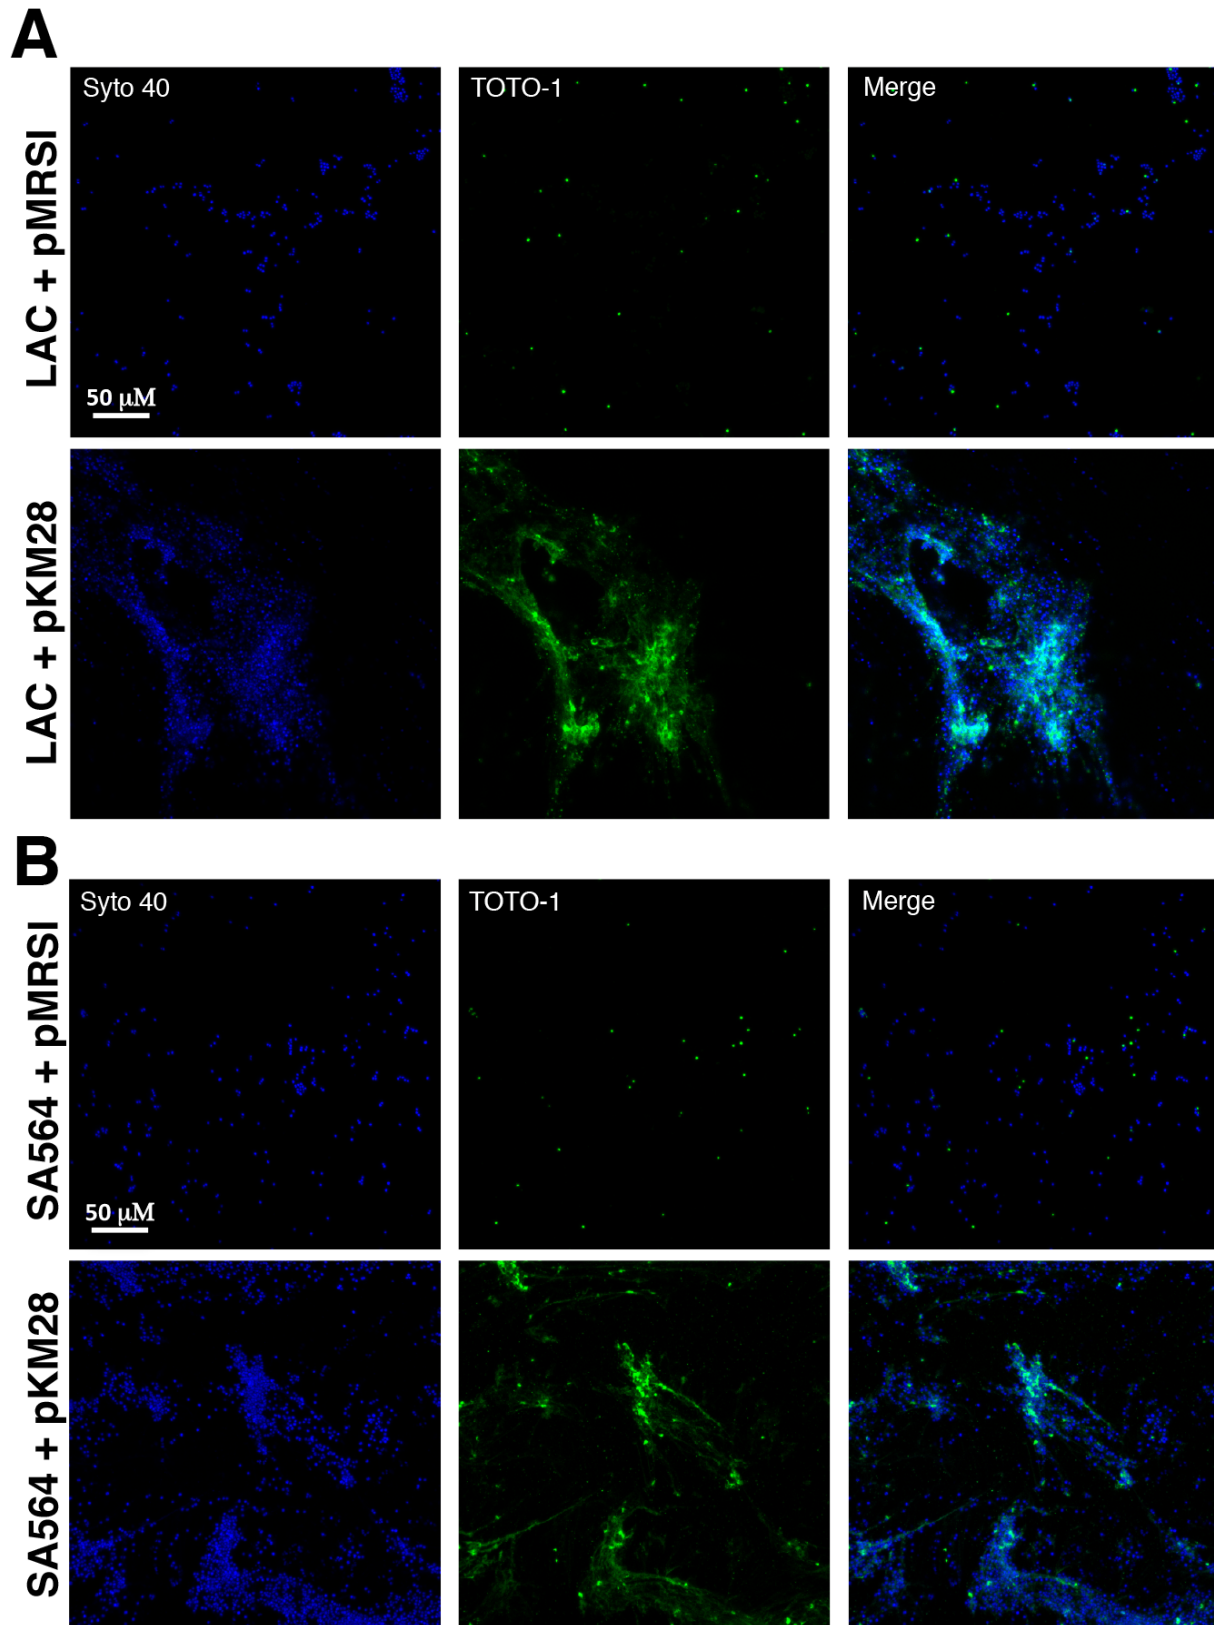

**Supplementary Figure 4. Overexpression of *ica* results in eDNA-dependent cell aggregation in LAC wild-type cells.** Exponentially growing (A) LAC or (B) SA564 wild-type cells cultured in TSB harboring pMRSI (vector) or pKM28 ( $P_{sarA-P1}$ -*icaADBC*) cells were imaged using CSLM. All cells were visualized using Syto 40 (blue signal) while eDNA and dead cells were stained by TOTO-1 (green signal). All images are representative of multiple experiments. Scale bar: 10  $\mu$ m where indicated; all panels are viewed at the same magnification.

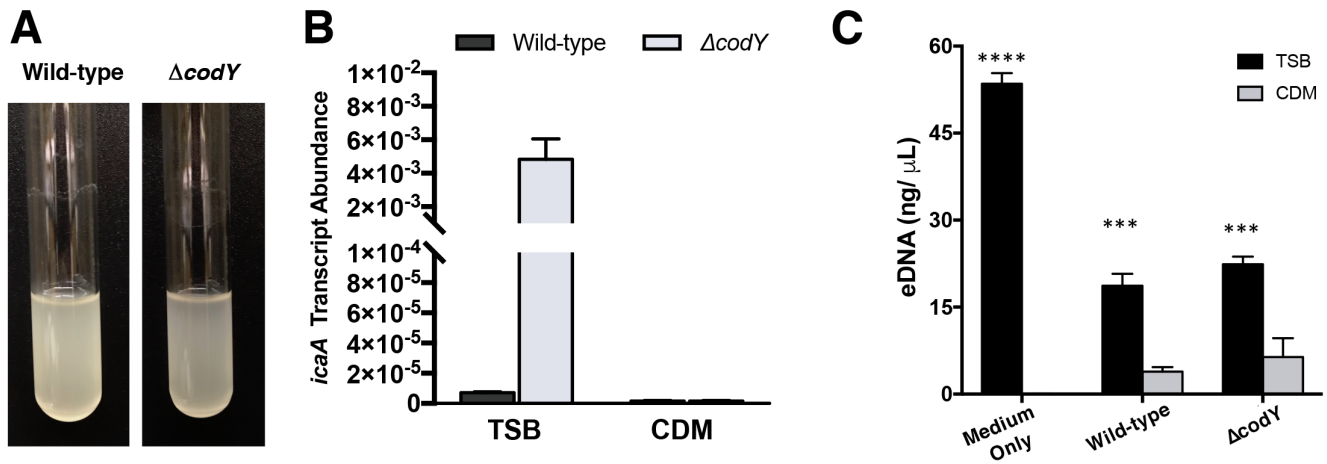

**Supplementary Figure 5.  $\Delta codY$  mutants fail to form cell aggregates in CDM medium. (A)** Representative images of the SA564 wild-type and  $\Delta codY$  mutant cultured overnight in CDM medium. **(B)** SA564 was grown to exponential phase aerobically in TSB or CDM, and *icaA* transcript abundance in wild-type (black) and a  $\Delta codY$  mutant (grey) cell was determined by qRT-PCR. Data were normalized to *rpoC* transcript. **(C)** eDNA was extracted from media only or supernatants from exponentially growing cells in TSB or CDM and quantified. \*\*\* $p < 0.001$ , \*\*\*\* $p < 0.0001$ ; Two-way ANOVA comparing TSB to the CDM for each condition with Sidak's multiple comparison post hoc test.

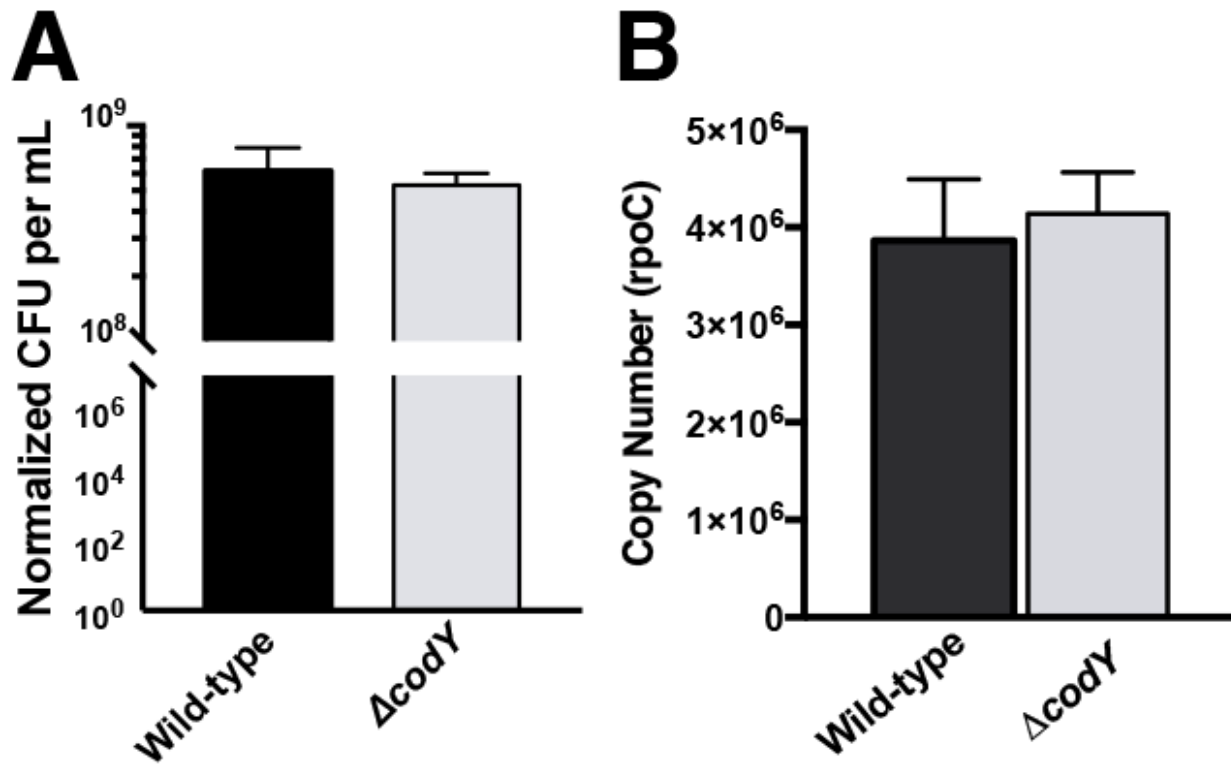

**Supplementary Figure 6. Cell lysis is not increased in a  $\Delta codY$  mutant.** SA564 (black bars) and  $\Delta codY$  mutant cells (grey bars) were grown exponential phase aerobically in TSB. **(A)** Colony forming units were determined by dilution plating. **(B)** DNA was extracted from culture supernatants and *rpoC* copy number was determined using quantitative PCR.



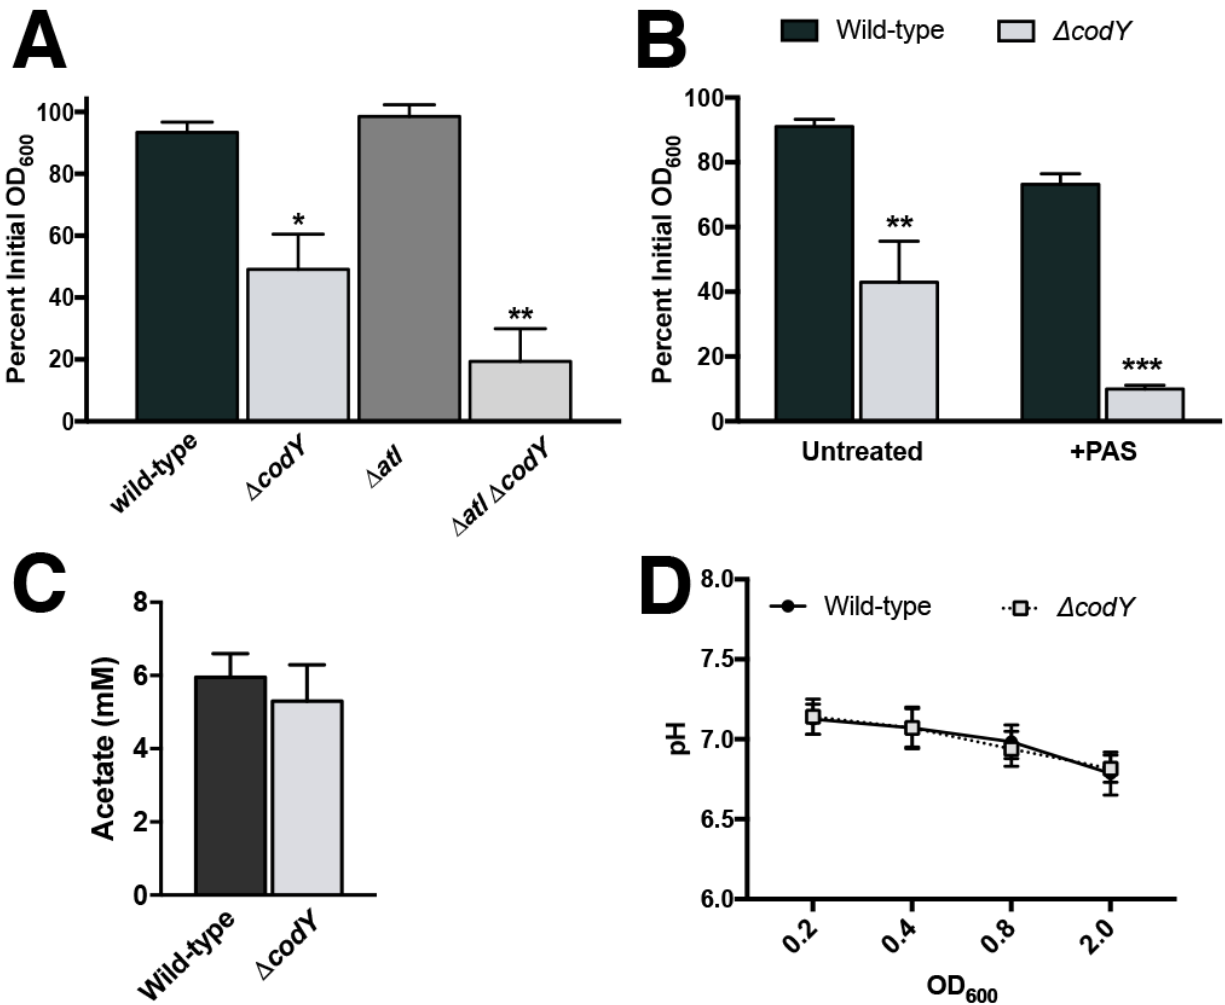

**Supplementary Figure 7. Atl is not required for cell aggregation in a  $\Delta codY$  mutant.** (A) Results of a settling assay are shown for cells of the indicated SA564 strains grown in TSB or (B) for the indicated SA564 strains in the presence or absence of polyanthrole sulfate (PAS). Statistics: (A)  $*p < 0.05$ ,  $*p < 0.05$ ,  $**p < 0.01$ , ANOVA with Dunnett's post analysis compared to Wild-type (B)  $**p < 0.01$ ,  $***p < 0.001$  compared to Wild-type (black bars) using Student's t-test. (C) Acetate concentration and (D) culture pH were determined from culture supernatants during exponential phase, when  $\Delta codY$  mutant cells aggregate. No statistical difference was found using a two-tailed t-test.

**Table S1. Image analysis of Figure 4B.**

| Raw        | Aggregate | Dispersed |
|------------|-----------|-----------|
| Syto 40    | 25684     | 1779      |
| dsRed (wt) | 3314      | 642       |

  

| Normalized | Aggregate | Dispersed |
|------------|-----------|-----------|
| Syto 40    | 22371     | 1137      |
| dsRed (wt) | 3314      | 642       |

  

|                                   |     |     |
|-----------------------------------|-----|-----|
| Fold-enrichment ( $\Delta codY$ ) | 6.8 | 1.8 |
|-----------------------------------|-----|-----|

Pixel intensities for the regions of interest are shown

**Table S2. Bacterial strains used in this study.**

| <i>S. aureus</i> strains | Relevant genotype or description                                                          | Source or Reference <sup>a</sup> |
|--------------------------|-------------------------------------------------------------------------------------------|----------------------------------|
| RN4220                   | restriction deficient, highly transformable                                               | (1)                              |
| SRB337                   | USA200 MSSA UAMS-1                                                                        | (2)                              |
| SRB547                   | Newman MSSA Isolate                                                                       | (3)                              |
| SRB561                   | SRB547 $\Delta codY::ermC$                                                                |                                  |
| SRB687                   | USA300 LAC CA-MRSA Em <sup>S</sup>                                                        | (4)                              |
| SRB813                   | SRB337 $codY::\phi N\Sigma$ ( $erm::tetM$ ) <sup>B</sup>                                  | (5)                              |
| SRB892                   | SRB687 $codY::\phi N\Sigma$ ( $erm::tetM$ )                                               |                                  |
| SRB1211                  | SA546 MSSA Isolate                                                                        | (6)                              |
| SRB1218                  | SRB1211                                                                                   |                                  |
| SRB1233                  | SRB687 $nuc::\phi N\Sigma$                                                                |                                  |
| SRB1234                  | SRB687 $codY::\phi N\Sigma(erm::tetM) nuc::\phi N\Sigma$                                  |                                  |
| SRB1236                  | SRB1211 $nuc::\phi N\Sigma$                                                               |                                  |
| SRB1237                  | SRB1211 $codY::\phi N\Sigma(erm::tetM) nuc::\phi N\Sigma$                                 |                                  |
| SRB1243                  | SRB1211 $codY::\phi N\Sigma(erm::tetM) soa-1$ (MraY <sup>L113M</sup> , <i>icaB</i> Q223*) |                                  |
| SRB1276                  | COL MRSA Isolate                                                                          | (7)                              |
| SRB1277                  | SRB1276 $\Delta codY::ermC$                                                               |                                  |
| SRB1278                  | MW2 MRSA Isolate                                                                          | (8)                              |
| SRB1279                  | SRB1278 $\Delta codY::ermC$                                                               |                                  |
| SRB1345                  | SRB1211 / pKM15                                                                           |                                  |
| SRB1346                  | SRB1211 $codY::\phi N\Sigma(erm::tetM)$ / pKM15                                           |                                  |
| SRB1347                  | SRB687 $codY::\phi N\Sigma(erm::tetM)$ / pKM15                                            |                                  |
| SRB1351                  | SRB1211 / pKM16                                                                           |                                  |
| SRB1352                  | SRB1211 $codY::\phi N\Sigma(erm::tetM)$ / pKM16                                           |                                  |
| SRB1353                  | SRB1211 $codY::\phi N\Sigma(erm::tetM) soa-1$ / pKM16                                     |                                  |
| SRB1378                  | SRB1276 $\Delta codY::ermC$ / pKM16                                                       |                                  |
| SRB1379                  | SRB687 $codY::\phi N\Sigma(erm::tetM)$ / pKM16                                            |                                  |
| SRB1468                  | SRB1211 $\Delta ica::tetM$                                                                |                                  |
| SRB1472                  | SRB1211 $\Delta ica::tetM \Delta codY::ermC$                                              |                                  |
| SRB1507                  | SRB1211 <i>mraY</i> *(L113M)                                                              |                                  |
| SRB1517                  | SRB1211 <i>mraY</i> *(L113M) $\Delta codY::ermC$                                          |                                  |
| SRB1575                  | SRB1211 $codY::\phi N\Sigma(erm::tetM) soa-1$ / pCN51                                     |                                  |
| SRB1576                  | SRB1211 $codY::\phi N\Sigma(erm::tetM) soa-1$ / pKM26                                     |                                  |
| SRB1580                  | SRB687 / pKM28                                                                            |                                  |
| SRB1581                  | SRB1211 / pKM28                                                                           |                                  |
| SRB1583                  | SRB687 / pMRSI                                                                            |                                  |
| SRB1584                  | SRB1211 / pMRSI                                                                           |                                  |
| SRB1603                  | SRB1211 / pKK30                                                                           |                                  |
| SRB1604                  | SRB1211 $codY::\phi N\Sigma(erm::tetM)$ / pKK30                                           |                                  |
| SRB1605                  | SRB1211 $codY::\phi N\Sigma(erm::tetM)$ / pKM25                                           |                                  |
| SRB1618                  | SA113 $\Delta lgt::ermB$                                                                  | (9)                              |



|         |                                                                                        |
|---------|----------------------------------------------------------------------------------------|
| SRB1624 | SRB1211 $\Delta$ <i>lgt::ermB</i>                                                      |
| SRB1625 | SRB1211 $\Delta$ <i>lgt::ermB</i> <i>codY::</i> $\phi$ N $\Sigma$ ( <i>erm::tetM</i> ) |

***P. aeruginosa***

**Strains**

SRB1611 PA01

A. Oglesby-  
Sherrouse

<sup>a</sup> Unless noted otherwise strains were constructed during the course of this study.

<sup>b</sup> Resistance marker was exchanged using the NTML toolbox as described in (10).

**Table S3. Oligonucleotides used in this study.<sup>a</sup>**

| Primer         | Sequence (5' to 3') <sup>b,c</sup>                                 | Purpose                  |
|----------------|--------------------------------------------------------------------|--------------------------|
| oDS001         | CGAAAGAACAATACGCAAAGAGG                                            | qRT-PCR of <i>nuc</i>    |
| oDS002         | TGCATTTGCTGAGCTACTTAGA                                             | qRT-PCR of <i>nuc</i>    |
| oKM74          | CCGCGCATGCTATTTTTGACTAAACCAAATGC                                   | Construction of pKM15    |
| oKM75          | AAGGAATTCTGCTCGATACATTTGCCCGATAA                                   | Construction of pKM15    |
| oKM76          | AAAGGATCCTGCTCGATACATTTGCCCGAT                                     | Construction of pKM16    |
| oKM77          | GGCGGTCGACTATTTTTGACTAAACCAAATGC                                   | Construction of pKM16    |
| oKM102         | GCCCGAATTC AATCATTAGAACCAGTTACTATTGG                               | Construction of pKM22    |
| oKM103         | TTGGTCTGACTTTACCATTTGTACCCGTTACAGC                                 | Construction of pKM22    |
| oKM111         | <i>TCTCTCGTTTTAGATAATAAGCTCATTACATTTACCCTCCATCAATAAG</i>           | Construction of pKM25    |
| oKM112         | <i>ATGAGCTTATTATCTAAAACGAGAGA</i>                                  | Construction of pKM25    |
| oKM113         | TTTGGATCCTTATTTACTTTTTTCTAATTCATC                                  | Construction of pKM25    |
| oKM120         | AATTAAGCGGCCGCTAATGACTTTCTAAATGGAAAATAC                            | Construction of pKM25    |
| oKM121         | GGGGCATGCCTATTTTTGACTAAACAAAATGCTAACC                              | Construction of pKM26    |
| oKM122         | <i>CACATGTAATTCCTCCTTTTATAGATTATCTGGATCCTGCTCGATACATTTGCCCGATA</i> | Construction of pKM26    |
| oKM123         | <i>GATAATCTATAAAAGGAGGAATTACATGTGAAGTATAGAAAATTTATAATTTTAG</i>     | Construction of pKM26    |
| oKM124         | CCCGAATTCCTAATCTTTTTCATGGAATCCGTCCC                                | Construction of pKM26    |
| oKM125         | GGCAGATCTAGATAATCTATAAAAGGAGGAATTACATTTGCAATTTTTTAACTTTTTGCT       | Construction of pKM28    |
| oKM126         | GCCGCATGCTTAATAAGCATTAAATGTTCAATTTATATGG                           | Construction of pKM28    |
| oNW039         | ACCGGCAACTGGGTTTATT                                                | qRT-PCR of <i>icaB</i>   |
| oNW040         | TGCATATCGTGGGTATGTGTT                                              | qRT-PCR of <i>icaB</i>   |
| oNW043         | TGAACAAGAAGCCTGACATAAA                                             | qRT-PCR of <i>icaA</i>   |
| oNW044         | CGTATTTGAGTGCAAGAACATTAG                                           | qRT-PCR of <i>icaA</i>   |
| oSRB239        | GGATTGGCTTCACCTGAAAA                                               | qRT-PCR of <i>rpoC</i>   |
| oSRB240        | CTTTCACGACGTACTTTAGA                                               | qRT-PCR of <i>rpoC</i>   |
| FRET substrate | 5Cy3-CCCGGATCCACCCC-3BHQ_2                                         | DNA FRET assay substrate |

<sup>a</sup> oKM primers were designed using SA564 as a reference genome (GenBank: CP010890.1). All others were designed from MRSA252.

<sup>b</sup> Underline denotes the presence of a restriction site for cloning.

<sup>c</sup> Italics denotes sequence homology for use in overlapping PCR.

**Table S4. Plasmids used in this study.**

| Plasmid | Relevant Genotype                                                                                                    | Reference <sup>a</sup> |
|---------|----------------------------------------------------------------------------------------------------------------------|------------------------|
| pCN51   | Shuttle vector for use in Gram positives (Ap <sup>R</sup> , Em <sup>R</sup> )                                        | (11)                   |
| pJB38   | Temperature sensitive plasmid for allelic exchange (Ap <sup>R</sup> , Cm <sup>R</sup> )                              | (10)                   |
| pKK30   | Stably maintained shuttle vector for <i>S. aureus</i> (Ap <sup>R</sup> , Tm <sup>R</sup> )                           | (12)                   |
| pKM15   | pMRSI with SarA-P1 promoter for constitutive sGFP expression (Ap <sup>R</sup> , Cm <sup>R</sup> )                    |                        |
| pKM16   | pMRSI with SarA-P1 promoter for constitutive sDsRed expression (Ap <sup>R</sup> , Cm <sup>R</sup> )                  |                        |
| pKM22   | pJB38 with <i>mraY</i> * allele (MraY <sup>L113M</sup> ) (Ap <sup>R</sup> , Cm <sup>R</sup> )                        |                        |
| pKM25   | pKK30 with native promoter fused to CodY for complementation (Ap <sup>R</sup> , Tm <sup>R</sup> )                    |                        |
| pKM26   | pCN51 with SarA-P1 promoter fused to <i>icaB</i> with TIR ribosome binding site (Ap <sup>R</sup> , Em <sup>R</sup> ) |                        |
| pKM28   | pMRSI with SarA-P1 promoter fused to the <i>icaADBC</i> locus (Ap <sup>R</sup> , Cm <sup>R</sup> )                   |                        |
| pMRSI   | sGFP-sDsRed double reporter shuttle vector (Ap <sup>R</sup> , Cm <sup>R</sup> )                                      | (5)                    |

<sup>a</sup>Unless otherwise noted all plasmids were engineered during this study.

## References

- Schenk S, Laddaga RA. 1992. Improved method for electroporation of *Staphylococcus aureus*. FEMS Microbiol Lett 73:133-8.
- Gillaspy A, Hickmon S, Skinner R, Thomas J, Nelson C, Smeltzer M. 1995. Role of the accessory gene regulator (*agr*) in pathogenesis of staphylococcal osteomyelitis. Infect Immun 63:3373-3380.
- Duthie ES, Lorenz LL. 1952. Staphylococcal coagulase; mode of action and antigenicity. J Gen Microbiol 6:95-107.
- Boles BR, Thoendel M, Roth AJ, Horswill AR. 2010. Identification of genes involved in polysaccharide-independent *Staphylococcus aureus* biofilm formation. PLoS One 5:e10146.
- Waters NR, Samuels DJ, Behera RK, Livny J, Rhee KY, Sadykov MR, Brinsmade SR. 2016. A spectrum of CodY activities drives metabolic reorganization and virulence gene expression in *Staphylococcus aureus*. Mol Microbiol 101:495-514.
- J.M. M, R.K. S. 1990. Genetic analysis of natural populations of *Staphylococcus aureus*, p 59-67. In Novick RP (ed), Molecular Biology of the staphylococci. VCH Publishers, New York, NY.
- Dyke K, Jevons M, Parker M. 1966. Penicillinase production and intrinsic resistance to penicillins in *Staphylococcus aureus*. Lancet 1:835-838.
- Baba T, Takeuchi F, Kuroda M, Yuzawa H, Aoki K, Oguchi A, Nagai Y, Iwama N, Asano K, Naimi T, Kuroda H, Cui L, Yamamoto K, Hiramatsu K. 2002. Genome and virulence determinants of high virulence community-acquired MRSA. Lancet 359:1819-1827.
- Stoll H, Dengjel J, Nerz C, Götz F. 2005. *Staphylococcus aureus* deficient in lipidation of prelipoproteins is attenuated in growth and immune activation. Infect Immun 73:2411-2423.
- Bose JL, Fey PD, Bayles KW. 2013. Genetic tools to enhance the study of gene function and regulation in *Staphylococcus aureus*. Appl Environ Microbiol 79:2218-24.
- Charpentier E, Anton AI, Barry P, Alfonso B, Fang Y, Novick RP. 2004. Novel cassette-based shuttle vector system for gram-positive bacteria. Appl Environ Microbiol 70:6076-6085.
- Krute CN, Krausz KL, Markiewicz MA, Joyner JA, Pokhrel S, Hall PR, Bose JL. 2016. Generation of a stable plasmid for in vitro and in vivo studies of *Staphylococcus*. Appl Environ Microbiol doi:10.1128/AEM.02370-16.
